# Supplementary material for: Femtosecond to nanosecond dynamics of 2,2′-bipyridine-3,3′-diol inside the nano-cavities of molecular containers
Source: Royal Society of Chemistry journal article supplement (doi:10.1039/c3cp54038c), 2013-10-26
Supplement: c3cp54038c.pdf [file c3cp54038c.pdf]

## Supporting Information

# **Femtosecond to Nanosecond Dynamics of 2,2'-Bipyridine-3,3'-diol inside the Nano-Cavities of Molecular Containers**

Krishna Gavvala, Abhigyan Sengupta, Raj Kumar Koninti, Partha Hazra\*

Department of Chemistry, Mendeleev Block, Indian Institute of Science Education and Research (IISER), Pune 411008, Maharashtra, India.

---

\* Corresponding author. E-mail: [p.hazra@iiserpune.ac.in](mailto:p.hazra@iiserpune.ac.in). Tel.: +91-20-2590-8077; Fax: +91-20-2589 9790.

**Table S1.** Fluorescence decay transients (measured in TCSPC set-up) of BP(OH)<sub>2</sub> in absence and presence of cucurbit[7]uril (CB7) collected at 465 nm ( $\lambda_{\text{ex}}=375$  nm).

| [CB7]             | $\tau_1$ (ns) | $a_1$ | $\tau_2$ (ns) | $a_2$ | $\tau_{\text{avg}}^{\#}$ | $\chi^2$ |
|-------------------|---------------|-------|---------------|-------|--------------------------|----------|
| 0                 | 0.63          | 1     | -             | -     | 0.63                     | 1.09     |
| 30 $\mu\text{M}$  | 0.64          | 0.92  | 8.43          | 0.08  | 1.26                     | 1.01     |
| 60 $\mu\text{M}$  | 0.67          | 0.84  | 8.56          | 0.16  | 1.93                     | 1.08     |
| 100 $\mu\text{M}$ | 0.68          | 0.7   | 8.65          | 0.3   | 3.07                     | 1.00     |
| 150 $\mu\text{M}$ | 0.68          | 0.63  | 8.65          | 0.37  | 3.63                     | 0.99     |
| 200 $\mu\text{M}$ | 0.69          | 0.44  | 8.73          | 0.55  | 5.15                     | 1        |
| 300 $\mu\text{M}$ | 0.69          | 0.32  | 8.71          | 0.68  | 6.16                     | 1.03     |
| 400 $\mu\text{M}$ | 0.69          | 0.25  | 8.74          | 0.75  | 6.69                     | 1.03     |
| 500 $\mu\text{M}$ | 0.69          | 0.17  | 8.73          | 0.83  | 7.37                     | 1.04     |

---

<sup>#</sup>  $\tau_{\text{avg}} = (a_1\tau_1 + a_2\tau_2)$

**Note S1.** BP(OH)<sub>2</sub> exhibits red shift in absorption spectra in presence of CB7, however, similar red shift is absent in case of β-cyclodextrin (β-CD), indicating CB7 forms more stable inclusion complex with BP(OH)<sub>2</sub> than that of β-CD. Observations from steady-state emission studies show that the enhancement in fluorescence of BP(OH)<sub>2</sub> in CB7 is much higher than that observed in case of β-CD. Though the stoichiometry is same for both the host molecules, binding affinity is 3 times more for CB7:BP(OH)<sub>2</sub> (3000 M<sup>-1</sup>) compared to β-CD:BP(OH)<sub>2</sub> (900 M<sup>-1</sup>). Pico-second time resolved study indicates that BP(OH)<sub>2</sub> exhibits bi-exponential fluorescence decay in both the hosts. But the lifetime of BP(OH)<sub>2</sub> in CB7 complex (~8.5 ns) is much higher than that of β-CD (~5 ns). This further confirms that stability of BP(OH)<sub>2</sub> in BP(OH)<sub>2</sub>:CB7 complex is higher than that in BP(OH)<sub>2</sub>:β-CD. Therefore, all the above results conclude that the behaviour of nano-cavity is different for CB7 from β-CD.

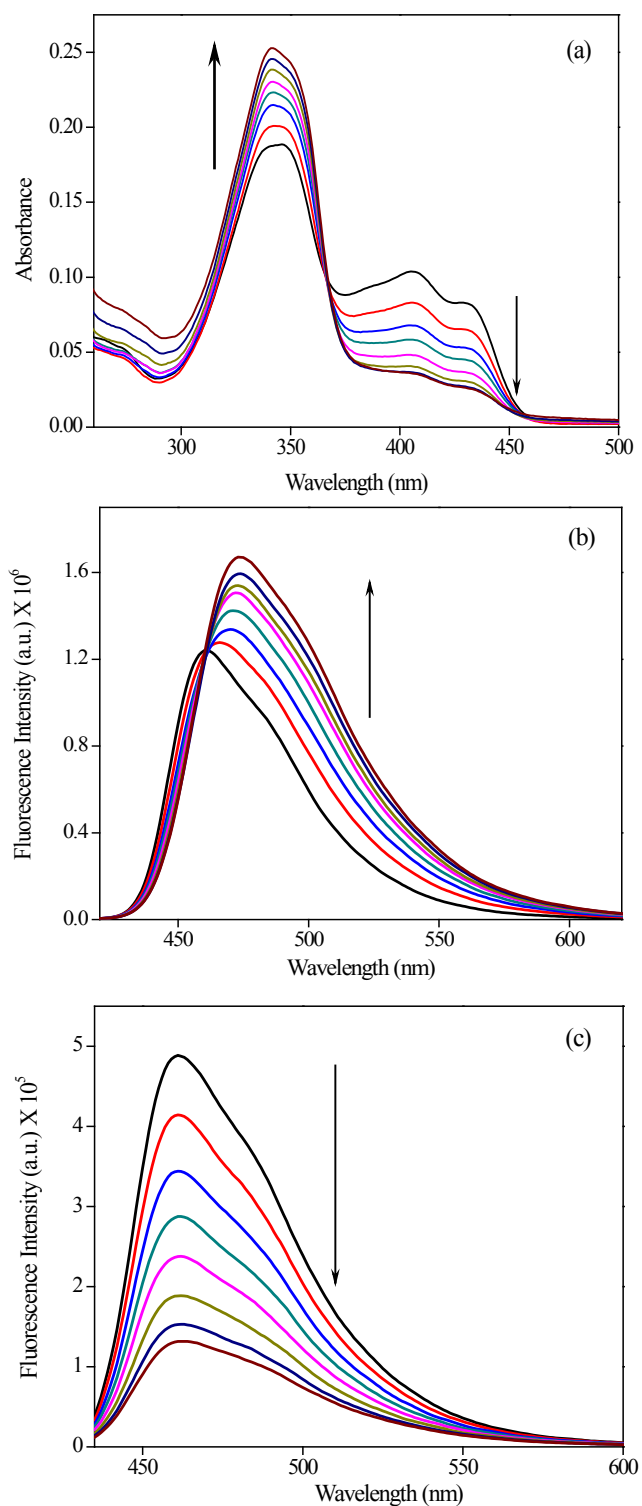

**Figure S1.** Absorption (a) and Emission (b) ( $\lambda_{\text{ex}}=345$  nm), (c) ( $\lambda_{\text{ex}}=425$  nm) spectra of BP(OH)<sub>2</sub> in presence of 0 to 14 mM of  $\beta$ -CD. Arrow indicates the direction of increase in  $\beta$ -CD concentration.

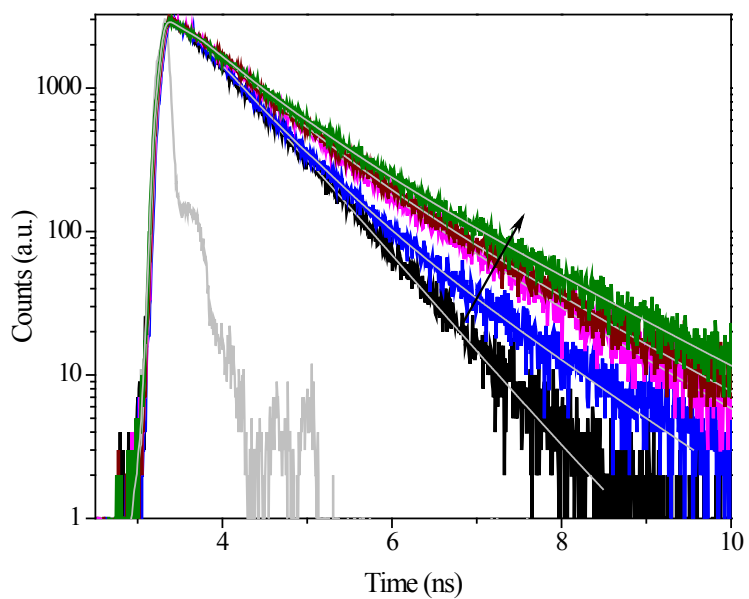

**Figure S2.** Fluorescence decay overlays of  $\text{BP(OH)}_2$  in presence of  $\beta$ -CD (from 0 to 14 mM) collected at 465 nm ( $\lambda_{\text{ex}}=375$  nm). Arrow indicates the direction of increase in  $\beta$ -CD concentration.
